# Supplementary material for: Refolding Increases the Chaperone-like Activity of αH-Crystallin and Reduces Its Hydrodynamic Diameter to That of α-Crystallin
Source: Int J Mol Sci. 2023 Aug 30;24(17):13473. doi: 10.3390/ijms241713473 (PMC10487585; doi:10.3390/ijms241713473)
Supplement: Supplementary file 1 [file ijms-24-13473-s001.zip › ijms-2532987-supplementary.pdf]

## Supplementary materials

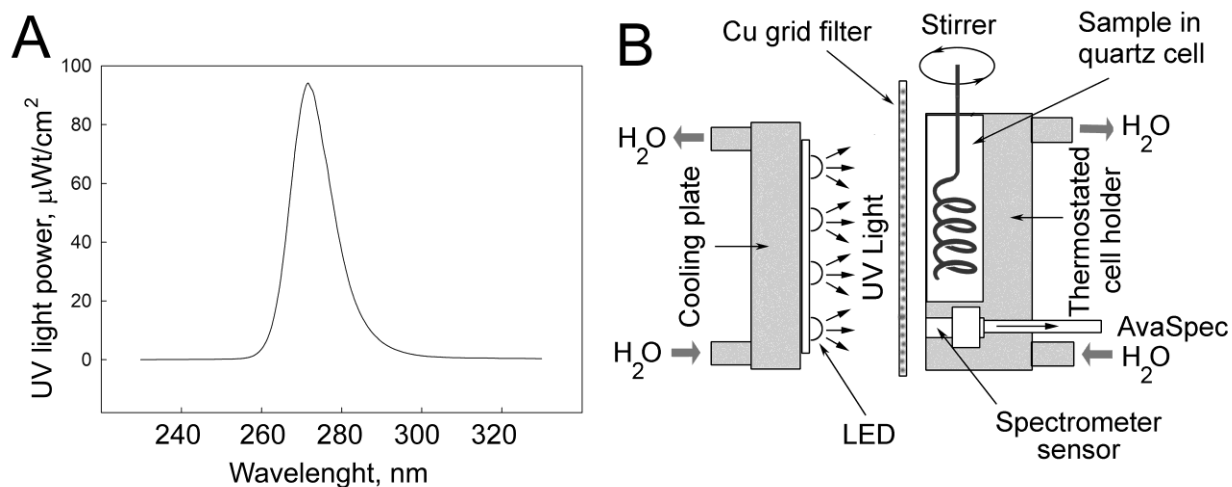

**Figure S1.** Irradiation of  $\beta_{\text{L}}$ -crystallin solution. A – UV light spectra from LED source. B – Drawing of the irradiance device.

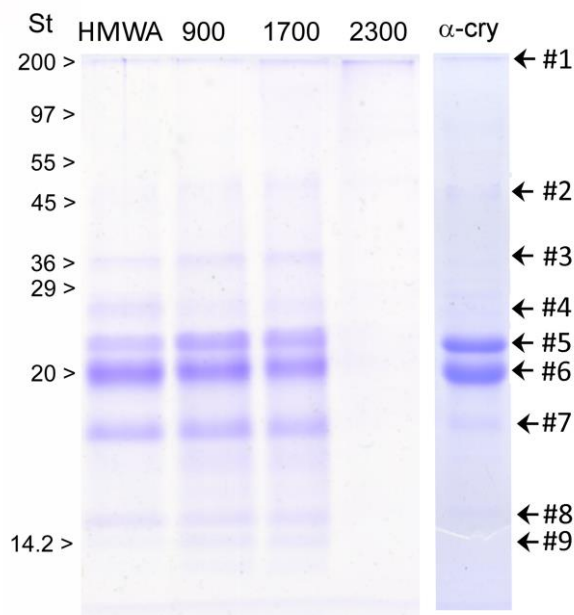

**Figure S2.** 15% SDS PAGE of HMWA, and HMWAr,  $\alpha$ -crystallin. St – protein standards, arrows indicate the polypeptide spots for image analysis.

**Table S1.** Polypeptide composition of HMWA fractions and  $\alpha$ -crystallin

| # number | Molecular weight | HMWA | Fraction 900 kDa % | Fraction 1700 kDa % | Fraction 2300 kDa % | $\alpha$ -crystallin % |
|----------|------------------|------|--------------------|---------------------|---------------------|------------------------|
| #1       | 200              | 2.5  | 2.3                | 2.8                 | 2.8                 |                        |
| #2       | 38.9             | 1.2  | 0.9                | 1.3                 | -                   |                        |
| #3       | 30.5             | 2.1  | 3.4                | 5.1                 | 1.9                 |                        |
| #4       | 22.4             | 4.5  | 1.5                | 2.7                 | 6.8                 |                        |
| #5       | 20.1             | 23.1 | 25.3               | 25.6                | 12.6                | 30                     |
| #6       | 19.8             | 48.3 | 45.6               | 39.7                | 52.1                | 60                     |
| #7       | 19.4             | 15.0 | 15.1               | 16.5                | 18.6                | 10                     |
| #8       | 11.5             | 2.5  | 3.5                | 3.5                 | 3.9                 |                        |
| #9       | 7.6              | 0.8  | 2.4                | 3.0                 | 1.5                 |                        |

**Table S2.** Molecular composition of UV $\beta$ <sub>L</sub>-crystallin formed under set of UV doses.

| Control |         | 70 mJ/cm <sup>2</sup> |         | 140 mJ/cm <sup>2</sup> |         | 180 mJ/cm <sup>2</sup> |         |
|---------|---------|-----------------------|---------|------------------------|---------|------------------------|---------|
| MW, kDa | Peak, % | MW, kDa               | Peak, % | MW, kDa                | Peak, % | MW, kDa                | Peak, % |
| 66      | 99.8    | 71                    | 99.5    | 65                     | 98.4    | 88                     | 97.3    |
| -       | -       | 659                   | 0.3     | 384                    | 1       | 1440                   | 1.9     |
| 1000    | 0.2     | 5500                  | 0.1     | 781                    | 0.3     | 2700                   | 0.8     |

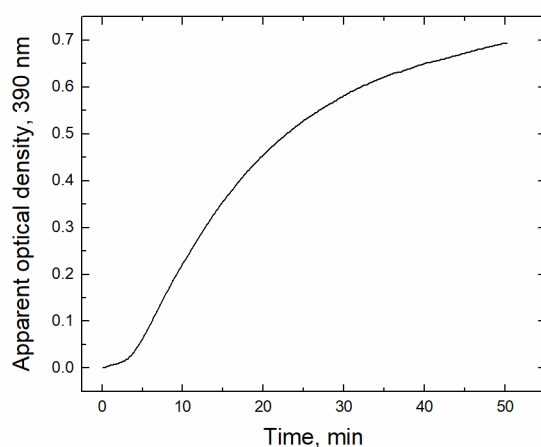**Figure S3.** Aggregation of UV $\beta$ <sub>L</sub>-crystallin at 37 °C. The summary incident power was  $70.0 \pm 0.1 \mu\text{W}/\text{cm}^2$ . The irradiation dose was  $140 \pm 5 \text{ mJ}/\text{cm}^2$ . Aggregation was monitored with Shimadzu 1240 min spectrophotometer.
